# Supplementary material
Source: PubMed Central journal article supplement (PMC3248001)
Supplement: supp_M111.282756_jbc.M111.282756-1.pdf [file supp_M111.282756_jbc.M111.282756-1.pdf]

**Supplemental Table 1. miRNA primer sequence**

| <b>Primer Name</b>            | <b>Primer Sequence</b>                                 |
|-------------------------------|--------------------------------------------------------|
| <b>mmu-miR-21 RT</b>          | 5'-GTCGTATCCAGTGCAGGGTCCGAGGTATTCGCACTGGATACGACTCAACAT |
| <b>mmu-miR-21 forward</b>     | 5'-TGCCGCCTAGCTTATCAGACTG                              |
| <b>mmu-miR-27b RT</b>         | 5'-GTCGTATCCAGTGCAGGGTCCGAGGTATTCGCACTGGATACGACGCAGAAC |
| <b>mmu-miR-27b forward</b>    | 5'-GCCGGCTTCACAGTGGCTA                                 |
| <b>mmu-miR-29c RT</b>         | 5'-GTCGTATCCAGTGCAGGGTCCGAGGTATTCGCACTGGATACGACTAACCG  |
| <b>mmu-miR-29c forward</b>    | 5'-GCCGGCTAGCACCATTTGAAAT                              |
| <b>mmu-miR-34a RT</b>         | 5'-GTCGTATCCAGTGCAGGGTCCGAGGTATTCGCACTGGATACGACACAACC  |
| <b>mmu-miR-34a forward</b>    | 5'-GCCTGCTGGCAGTGTCTTAGC                               |
| <b>mmu-miR-34b-3p RT</b>      | 5'-GTCGTATCCAGTGCAGGGTCCGAGGTATTCGCACTGGATACGACGATGGC  |
| <b>mmu-miR-34b-3p forward</b> | 5'-CGCCGGAATCACTAACTCCAC                               |
| <b>mmu-miR-34c RT</b>         | 5'-GTCGTATCCAGTGCAGGGTCCGAGGTATTCGCACTGGATACGACGCAATC  |
| <b>mmu-miR-34c forward</b>    | 5'-GCAGCCAGGCAGTGTAGTTAGC                              |
| <b>mmu-miR-140 RT</b>         | 5'-GTCGTATCCAGTGCAGGGTCCGAGGTATTCGCACTGGATACGACCTACCAT |
| <b>mmu-miR-140 forward</b>    | 5'-TCCGCGCAGTGGTTTTACC                                 |
| <b>mmu-miR-143 RT</b>         | 5'-GTCGTATCCAGTGCAGGGTCCGAGGTATTCGCACTGGATACGACGAGCTAC |
| <b>mmu-miR-143 forward</b>    | 5'-GCCGGCTGAGATGAAGCAC                                 |
| <b>mmu-miR-202-3p RT</b>      | 5'-GTCGTATCCAGTGCAGGGTCCGAGGTATTCGCACTGGATACGACTCTTCC  |
| <b>mmu-miR-202-3p forward</b> | 5'-GCTTCCAGAGGTATAGCGCATG                              |
| <b>mmu-miR-203 RT</b>         | 5'-GTCGTATCCAGTGCAGGGTCCGAGGTATTCGCACTGGATACGACCTAGTG  |
| <b>mmu-miR-203 forward</b>    | 5'-GCGGCCGTGAAATGTTTTAGGAC                             |
| <b>mmu-miR-328 RT</b>         | 5'-GTCGTATCCAGTGCAGGGTCCGAGGTATTCGCACTGGATACGACACGGAAG |
| <b>mmu-miR-328 forward</b>    | 5'-ATGAACTGGCCCTCTCTGCC                                |

| <b>Primer Name</b>             | <b>Primer Sequence</b>                                |
|--------------------------------|-------------------------------------------------------|
| <b>mmu-miR-469 RT</b>          | 5'-GTCGTATCCAGTGCAGGGTCCGAGGTATTCGCACTGGATACGACGGACAC |
| <b>mmu-miR-469 forward</b>     | 5'-GCTTCCTGCCTCTTTCATTGATC                            |
| <b>mmu-miR-470 RT</b>          | 5'-GTCGTATCCAGTGCAGGGTCCGAGGTATTCGCACTGGATACGACTCAC   |
| <b>mmu-miR-470 forward</b>     | 5'-GCTTCCTTCTTGGACTGGCAC                              |
| <b>mmu-let-7a/d RT</b>         | 5'-GTCGTATCCAGTGCAGGGTCCGAGGTATTCGCACTGGATACGACAACAT  |
| <b>mmu-let-7a/d forward</b>    | 5'-GCCGCCAGAGGTAGTAGGTTG                              |
| <b>mmu-let-7b RT</b>           | 5'-GTCGTATCCAGTGCAGGGTCCGAGGTATTCGCACTGGATACGACAACCAC |
| <b>mmu-let-7b forward</b>      | 5'-GCCGCCTGAGGTAGTAGGTTG                              |
| <b>mmu-let-7c RT</b>           | 5'-GTCGTATCCAGTGCAGGGTCCGAGGTATTCGCACTGGATACGACAACCAT |
| <b>mmu-let-7c forward</b>      | 5'-GCCGCCAGAGGTAGTAGGTTG                              |
| <b>mmu-let-7e RT</b>           | 5'-GTCGTATCCAGTGCAGGGTCCGAGGTATTCGCACTGGATACGACAACAT  |
| <b>mmu-let-7e forward</b>      | 5'-GCTGCCTGAGGTAGGAGGTTG                              |
| <b>mmu-let-7f RT</b>           | 5'-GTCGTATCCAGTGCAGGGTCCGAGGTATTCGCACTGGATACGACAACAT  |
| <b>mmu-let-7f forward</b>      | 5'-GGCCGCCTGAGGTAGTAGATTG                             |
| <b>mmu-let-7g RT</b>           | 5'-GTCGTATCCAGTGCAGGGTCCGAGGTATTCGCACTGGATACGACAACGT  |
| <b>mmu-let-7g forward</b>      | 5'-GGCCGCCTGAGGTAGTAGTTTG                             |
| <b>miRNA universal reverse</b> | 5'-AGTGCAGGGTCCGAGG                                   |
| <b>U6 RT</b>                   | 5'-CGCTTCACGAATTTGCGTGTC                              |
| <b>U6 forward</b>              | 5'-TCGCTTCGGCAGCACATATAC                              |
| <b>U6 reverse</b>              | 5'-GCGTGTCATCCTTGCGCAG                                |
