# Supplementary material
Source: PubMed Central journal article supplement (PMC3248001)
Supplement: supp_M111.282756_jbc.M111.282756-2.pdf [file supp_M111.282756_jbc.M111.282756-2.pdf]

**Supplemental Table 2. Pri-miRNA and gene specific primer sequence**

| <b>Primer Name</b>                | <b>Primer Sequence</b>     |
|-----------------------------------|----------------------------|
| <b>pri-miR-27b-F</b>              | 5'-AATCACATTGCCAGGGATTACC  |
| <b>pri-miR-27b-R</b>              | 5'-GCATCTTCGAAGGCTGTTGGC   |
| <b>pri-miR-34c-F</b>              | 5'-CCAGAACAGTTCCTGCTGC     |
| <b>pri-miR-34c-R</b>              | 5'-TTAGCTGGTGCTCTCAGAC     |
| <b>pri-miR-469-F</b>              | 5'-CTTTGTGTTTCCCAAGGACG    |
| <b>pri-miR-469-R</b>              | 5'-GGAAAGGTCACGATCATAGG    |
| <b>pri-miR-470-F</b>              | 5'-GGTTATGAACCACAATATGC    |
| <b>pri-miR-470-R</b>              | 5'-CATTTCCATCATGATGTTTCAGG |
| <b>pri-miR-let7d-F</b>            | 5'-GGCTTTTGCCAAGATCACGTG   |
| <b>pri-miR-let7d-R</b>            | 5'-GCAGATGCACTTCACACACC    |
| <b>pri-miR-let7g-F</b>            | 5'-GTTGGGTTGTTTTTCTAAGTG   |
| <b>pri-miR-let7g-R</b>            | 5'-CTCTGCAGGACGCACTTGAGG   |
| <b>pri-miR-203-F</b>              | 5'-GCCTGGAAAAACCGGTCAG     |
| <b>pri-miR-203-R</b>              | 5'-TCCGGAGCCACAGCTCAGC     |
| <b><math>\beta</math>-actin-F</b> | 5'-AGGCATTGCTGACAGGATGCAG  |
| <b><math>\beta</math>-actin-R</b> | 5'-AGCACTTGCGGTGCACGATG    |
| <b>Prm2-qPCR-F</b>                | 5'-GGCAAGGGCTGAGCCCAGAGC   |
| <b>Prm2-qPCR-R</b>                | 5'-TCGGGATCTTCTGCAGCCTCTGC |
| <b>TP2-qPCR-F</b>                 | 5'-GCTCTAGCTCCAGCCCCAGC    |
| <b>TP2-qPCR-R</b>                 | 5'-CTTGTATCTTCGCCCTGAG     |
| <b>Drosha-qPCR-F</b>              | 5'-TCAGATCTCCGCCATGCGATGG  |
| <b>Drosha-qPCR-R</b>              | 5'-GTTTCAATAAGTTGCCGATCC   |
| <b>DGCR8-qPCR-F</b>               | 5'-AGAAGCTGATCACTCTATCTG   |
| <b>DGCR8-qPCR-R</b>               | 5'-GTTCCAGATCCGTAAGTCACAC  |
