# Supplementary material
Source: PubMed Central journal article supplement (PMC3248001)
Supplement: supp_M111.282756_jbc.M111.282756-3.pdf [file supp_M111.282756_jbc.M111.282756-3.pdf]

**Supplemental Table 3 Construct Primer Sequence**

| <b>Primer Name</b>         | <b>Primer Sequence</b>                       |
|----------------------------|----------------------------------------------|
| <b>psi-CHECK2/H1fnt-F</b>  | 5'-GTA ACTCGAGAAATCCCCCAGACCACTCAG           |
| <b>psi-CHECK2/H1fnt-R</b>  | 5'-ATACTTAAGCGGCCGCGTAAATTGCTTCAATGAAAGAG    |
| <b>psi-CHECK2/PGK2-F</b>   | 5'-GTA ACTCGAGGATGAGAATGCTAAAGTTGG           |
| <b>psi-CHECK2/PGK2-R</b>   | 5'-ATACTTAAGCGGCCGCTAGTTGACATGAGAATGTTTCC    |
| <b>psi-CHECK2/Prm1-F</b>   | 5'-GTA ACTCGAGGCCAGATACCGATGCTGCCGCAG        |
| <b>psi-CHECK2/Prm1-R</b>   | 5'-ATACTTAAGCGGCCGCGACAGGTGGCATTGTTCC        |
| <b>psi-CHECK2/Prm2-F</b>   | 5'-GTA ACTCGAGGTTTCGCTACCGAATGAGGAGC         |
| <b>psi-CHECK2/Prm2-R</b>   | 5'-ATACTTAAGCGGCCGCTGGCAGGTGGCTTTGCTCAG      |
| <b>psi-CHECK2/TP1-F</b>    | 5'-GTA ACTCGAGTCGACCAGCCGCAAGCTAAAGAC        |
| <b>psi-CHECK2/TP1-R</b>    | 5'-ATACTTAAGCGGCCGCTGAGATGTTGGGGAGAAACAG     |
| <b>psi-CHECK2/TP2-F</b>    | 5'-GTA ACTCGAGGACACCAAGATGCAGAGCCTTC         |
| <b>psi-CHECK2/TP2-R</b>    | 5'-ATACTTAAGCGGCCGCCAAGCTTTAATCCATGTTGC      |
| <b>psi-CHECK2/Prm2-a-F</b> | 5'-GTA ACTCGAGGTTTCGCTACCGAATGAGGAGC         |
| <b>psi-CHECK2/Prm2-a-R</b> | 5'-ATACTTAAGCGGCCGCCTCCTCCTCCTTCGGGATCTTC    |
| <b>psi-CHECK2/Prm2-b-F</b> | 5'-GTA ACTCGAGGAAGATCCCGAAGGAGGAGGAG         |
| <b>psi-CHECK2/Prm2-b-R</b> | 5'-ATACTTAAGCGGCCGCTGGCAGGTGGCTTTGCTCAG      |
| <b>psi-CHECK2/Prm2-c-F</b> | 5'-GTA ACTCGAGGTTTCGCTACCGAATGAGGAGC         |
| <b>psi-CHECK2/Prm2-c-R</b> | 5'-ATACTTAAGCGGCCGCACGCCTCTTGTGGATCCTATGTAGC |
| <b>psi-CHECK2/Prm2-d-F</b> | 5'-GTA ACTCGAGGTTTCGCTACCGAATGAGGAGC         |
| <b>psi-CHECK2/Prm2-d-R</b> | 5'-ATACTTAAGCGGCCGCGGCTCAGCCCTTGCCCCTGCCCT   |
| <b>psi-CHECK2/Prm2-e-F</b> | 5'-TTAGCTCGAGCAGAGCGCGTAGAGGACTATG           |
| <b>psi-CHECK2/Prm2-e-R</b> | 5'-ATACTTAAGCGGCCGCACGCCTCTTGTGGATCCTATGTAGC |

| <b>Primer Name</b>             | <b>Primer Sequence</b>                                           |
|--------------------------------|------------------------------------------------------------------|
| <b>psi-CHECK2/Prm2-f-F</b>     | 5'-TTAGCTCGAGCAGAGCGCGTAGAGGACTATG                               |
| <b>psi-CHECK2/Prm2-f-R</b>     | 5'-ATACTTAAGCGGCCGCGTAGCCTCTTACGAGAGCAGCGC                       |
| <b>psi-CHECK2/Prm2-g-F</b>     | 5'-TTAGCTCGAGCAGAGCGCGTAGAGGACTATG                               |
| <b>psi-CHECK2/Prm2-g-R</b>     | 5'-ATACTTAAGCGGCCGCGCCTGTGTCTGTGGTGGTGGTGG                       |
| <b>psi-CHECK2/Prm2-h-F</b>     | 5'-TTAGCTCGAGGTAAGAGGCTACATAGGATCCACAAGAGGCGTCGGCGGCCGCTTAAGTAT  |
| <b>psi-CHECK2/Prm2-h-R</b>     | 5'-ATACTTAAGCGGCCGCGCAGCCTCTTGTGGATCCTATGTAGCCTCTTACCTCGAGCTAA   |
| <b>pCMV-tag2b/Prm2-F</b>       | 5'-TTAGGAATTCGTTTCGCTACCGAATGAGGAG                               |
| <b>pCMV-tag2b/Prm2-R</b>       | 5'-CTAACTCGAGGTGATGGTGCCTCCTACATTTCC                             |
| <b>pCMV-tag2b/TP2-F</b>        | 5'-TTAGGAATTCGACACCAAGATGCAGAGCCTTCC                             |
| <b>pCMV-tag2b/TP2-R</b>        | 5'-CTAACTCGAGTCACTTGTATCTTCGCCCTGAGC                             |
| <b>Prm2-a/I-aX sense</b>       | 5'-CAGGCGCTGCTCTCGTAACACCCTACATAGGATCCACAA                       |
| <b>Prm2-a/I-aX anti-sense</b>  | 5'-TTGTGGATCCTATGTAGGGTGTACGAGAGCAGCGCCTG                        |
| <b>Prm2-a/II-aX sense</b>      | 5'-GGCTACATAGGATCCACAACACCCGTCGGTCATGCAGAAGGC                    |
| <b>Prm2-a/II-aX anti-sense</b> | 5'-GCCTTCTGCATGACCGACGGGTGTTGTGGATCCTATGTAGCC                    |
| <b>Prm2-a/II-bX sense</b>      | 5'-GCTACATAGGATCCACAACCTCCGGTCGGTCATGCAGAAGG                     |
| <b>Prm2-a/II-bX anti-sense</b> | 5'-CCTTCTGCATGACCGACCGGAGTTGTGGATCCTATGTAGC                      |
| <b>psi-CHECK2/TP2-CD-F</b>     | 5'-GTAACCTCGAGGACACCAAGATGCAGAGCCTTCC                            |
| <b>psi-CHECK2/TP2-CD-R</b>     | 5'-ATACTTAAGCGGCCGCTCACTTGTATCTTCGCCCTGAGC                       |
| <b>psi-CHECK2/TP2-MRE-F</b>    | 5'-GTAACCTCGAGGAGGCGGAAACGGACTCACAGAGCTAAGAGGCGTGCGGCCGCTTAAGTAT |
| <b>psi-CHECK2/TP2-MRE-R</b>    | 5'-ATACTTAAGCGGCCGCACGCCTCTTAGCTCTGTGAGTCCGTTTCCGCCTCCTCGAGTTAC  |
| <b>Tp2-CD/X sense</b>          | 5'-GGAAACGGACTCACAGAGCTAACACCCGTAGCTCAGGGCGAAG                   |
| <b>Tp2-CD/X anti-sense</b>     | 5'-CTTCGCCCTGAGCTACGGGTGTTAGCTCTGTGAGTCCGTTTCC                   |
| <b>Tp2-MRE/X-F</b>             | 5'-GTAACCTCGAGGAGGCGGAAACGGACTCACAGAGCTAACACCCGTGCGGCCGCTTAAGTAT |
| <b>Tp2-MRE/X-R</b>             | 5'-ATACTTAAGCGGCCGCACGGGTGTTAGCTCTGTGAGTCCGTTTCCGCCTCCTCGAGTTAC  |
