# Supplementary material
Source: PubMed Central journal article supplement (PMC3248001)
Supplement: supp_M111.282756_jbc.M111.282756-4.pdf [file supp_M111.282756_jbc.M111.282756-4.pdf]

**Supplemental Table 4. List of differentially up-regulated miRNAs in the round spermatids of GRTH null mice**

Information of genomic locus/miR cluster/IT/IG was obtained from <http://mirbase.org/>. IT: intragenic; IG intergenic.

| <b>ID (mmu-)</b>  | <b>Genomic locus</b>       | <b>Clustered miRNAs (mmu-)</b>                                                                                                                          | <b>IG/IT</b> |
|-------------------|----------------------------|---------------------------------------------------------------------------------------------------------------------------------------------------------|--------------|
| <b>miR-181a</b>   | 1: 139,861,032-139,865,118 | miR-181a, miR-181b                                                                                                                                      | IG           |
| <b>miR-214</b>    | 1: 164,151,499-164,155,608 | miR-214, miR-199a                                                                                                                                       | IT           |
| <b>miR-194</b>    | 1: 187,135,198-187,139,571 | miR-194, miR-215                                                                                                                                        | IT           |
| <b>miR-215</b>    |                            |                                                                                                                                                         | IT           |
| <b>miR-350</b>    | 1: 178,700,456-178,704,554 |                                                                                                                                                         | IT           |
| <b>miR-30a</b>    | 1: 23,277,108-23,281,178   |                                                                                                                                                         | IG           |
| <b>miR-375</b>    | 1: 74,945,232-74,949,295   |                                                                                                                                                         | IT           |
| <b>miR-467a</b>   |                            |                                                                                                                                                         | IT           |
| <b>miR-467b</b>   | 2: 10,393,558-10,404,947   | miR-669d, miR-466f, miR-297a, miR-466o, miR-467c, miR-466b, miR-669k, miR-467a,<br>miR-669g, miR-669j, miR-466e, miR-467b, miR-466c, miR-669a           | IT           |
| <b>miR-467c</b>   |                            |                                                                                                                                                         | IT           |
| <b>miR-467d</b>   | 2: 10,427,257-10,429,434   | miR-466b, miR-669a, miR-467e, miR-466p, miR-467d, miR-466a, miR-297c, miR-669c,<br>miR-297b, miR-466d, miR-669m, miR-466n, miR-669o, miR-466g, miR-466h | IT           |
| <b>miR-467e</b>   |                            |                                                                                                                                                         | IT           |
| <b>miR-130a</b>   | 2: 84,579,272-84,583,335   |                                                                                                                                                         | IG           |
| <b>miR-296-5p</b> | 2: 174,090,548-174,094,626 | miR-298, miR-296                                                                                                                                        | IG           |
| <b>miR-126-3p</b> | 2: 26,444,877-26,448,949   |                                                                                                                                                         | IT           |
| <b>miR-9</b>      | 3: 88,017,520-88,021,608   | miR-9, miR-3093                                                                                                                                         | IT           |
| <b>miR-15b</b>    | 3: 68,811,694-68,815,757   | miR-15b, miR-16                                                                                                                                         | IT           |
| <b>miR-137</b>    | 3: 118,134,775-118,138,847 |                                                                                                                                                         | IT           |
| <b>miR-30c</b>    |                            |                                                                                                                                                         | IT           |
| <b>miR-30e</b>    | 4: 120,440,139-120,447,302 | miR-30e, miR-30c                                                                                                                                        | IT           |

| <b>ID (mmu-)</b>   | <b>Genomic locus</b>       | <b>Clustered miRNAs (mmu-)</b>                                  | <b>IG/IT</b> |
|--------------------|----------------------------|-----------------------------------------------------------------|--------------|
| <b>miR-34a</b>     | 4: 149,440,563-149,444,664 |                                                                 | IG           |
| <b>miR-879</b>     | 5: 9,373,704-9,377,779     |                                                                 | IT           |
| <b>miR-469</b>     | 5: 113,772,106-113,772,179 |                                                                 | IG           |
| <b>miR-93</b>      |                            |                                                                 | IT           |
| <b>miR-25</b>      | 5: 138,604,549-138,609,046 | miR-106b, miR-93, miR-25                                        | IT           |
| <b>miR-106b</b>    |                            |                                                                 | IT           |
| <b>miR-339-5p</b>  | 5: 139,843,604-139,847,699 |                                                                 | IT           |
| <b>miR-218</b>     | 5: 48,613,181-48,617,290   |                                                                 | IT           |
| <b>miR-574-3p</b>  | 5: 65,359,557-65,363,634   |                                                                 | IT           |
| <b>miR-29a</b>     |                            |                                                                 | IG           |
| <b>miR-29b</b>     | 6: 31,010,660-31,015,093   | miR-29b, miR-29a                                                | IT           |
| <b>miR-148a</b>    | 6: 51,217,811-51,221,909   |                                                                 | IG           |
| <b>miR-182</b>     |                            |                                                                 | IG           |
| <b>miR-183</b>     | 6: 30,113,918-30,121,737   | miR-96, miR-182, miR-183                                        | IG           |
| <b>miR-200c</b>    | 6: 124,666,340-124,670,408 | miR-200c, miR-141                                               | IT           |
| <b>miR-202-3p</b>  | 7: 147,141,588-147,145,659 |                                                                 | IT           |
| <b>miR-150</b>     | 7: 52,375,127-52,379,191   | miR-150, miR-5121                                               | IG           |
| <b>miR-139-5p</b>  | 7: 108,621,890-108,625,957 |                                                                 | IT           |
| <b>miR-293</b>     |                            |                                                                 | IG           |
| <b>miR-294</b>     | 7: 3,218,344-3,222,725     | miR-290, miR-291a, miR-292, miR-291b, miR-293, miR-294, miR-295 | IG           |
| <b>miR-328</b>     | 8: 107,830,264-107,834,360 |                                                                 | IT           |
| <b>miR-140</b>     | 8: 110,073,144-110,077,213 |                                                                 | IT           |
| <b>miR-27a</b>     | 8: 86,730,571-86,734,657   | miR-23a, miR-27a, miR-24, miR-3074                              | IG           |
| <b>miR-199a-3p</b> | 9: 21,298,939-21,303,008   |                                                                 | IT           |

| <b>ID (mmu-)</b>   | <b>Genomic locus</b>        | <b>Clustered miRNAs (mmu-)</b> | <b>IG/IT</b> |
|--------------------|-----------------------------|--------------------------------|--------------|
| <b>miR-100</b>     | 9: 41,337,508-41,341,587    | miR-100, let-7a                | IT           |
| <b>miR-34c</b>     | 9: 50,909,139-50,913,750    | miR-34b, miR-34c               | IG           |
| <b>miR-34b-3p</b>  |                             |                                | IG           |
| <b>let-7g</b>      | 9: 106,079,171-106,083,258  |                                | IT           |
| <b>miR-125b-5p</b> | 9: 41,388,009-41,392,085    |                                | IT           |
| <b>miR-184</b>     | 9: 89,695,098-89,699,166    |                                | IG           |
| <b>miR-331-3p</b>  | 10: 93,424,513-93,428,608   |                                | IT           |
| <b>miR-677</b>     | 10: 127,520,342-127,524,419 |                                | IT           |
| <b>miR-103</b>     | 11: 35,593,898-35,597,983   |                                | IT           |
| <b>miR-142-3p</b>  | 11: 87,568,366-87,572,429   |                                | IT           |
| <b>miR-152</b>     | 11: 96,709,707-96,713,779   |                                | IT           |
| <b>miR-146a</b>    | 11: 43,185,899-43,189,963   |                                | IG           |
| <b>miR-10a</b>     | 11: 96,176,479-96,180,588   |                                | IG           |
| <b>miR-301a</b>    | 11: 86,924,506-86,928,591   |                                | IT           |
| <b>miR-340-3p</b>  | 11: 49,881,204-49,885,301   |                                | IT           |
| <b>miR-497</b>     | 11: 70,046,219-70,050,302   | miR-497, miR-195               | IG           |
| <b>miR-324-3p</b>  | 11: 69,823,545-69,827,633   |                                | IT           |
| <b>miR-744</b>     | 11: 65,546,235-65,550,334   |                                | IT           |
| <b>miR-21</b>      | 11: 86,395,569-86,399,660   |                                | IT           |
| <b>miR-451</b>     | 11: 77,884,672-77,888,743   | miR-451, miR-144               | IG           |
| <b>miR-324-5p</b>  | 11: 69,823,545-69,827,633   |                                | IT           |
| <b>miR-142-5p</b>  | 11: 87,568,366-87,572,429   |                                | IT           |
| <b>miR-203</b>     | 12: 113,367,091-113,371,166 |                                | IG           |

| <b>ID (mmu-)</b>  | <b>Genomic locus</b>        | <b>Clustered miRNAs (mmu-)</b>                                                                                                   | <b>IG/IT</b> |
|-------------------|-----------------------------|----------------------------------------------------------------------------------------------------------------------------------|--------------|
| <b>miR-127</b>    | 12: 110,829,056-110,834,809 | miR-337, miR-540, miR-665, miR-3070a, miR-3070b, miR-431, miR-433, miR-127,                                                      | IT           |
| <b>miR-434-3p</b> |                             | miR-434, miR-432, miR-3071, miR-136                                                                                              | IT           |
| <b>miR-409-3p</b> | 12: 110,979,368-110,983,446 | miR-382, miR-134, miR-668, miR-485, miR-453, miR-154, miR-496, miR-377, miR-541,<br>miR-409, miR-412, miR-369, miR-410, miR-3072 | IT           |
| <b>miR-24</b>     | 13: 63,400,516-63,404,583   | miR-23b, miR-27b, miR-3074, miR-24                                                                                               | IT           |
| <b>let-7d</b>     | 13: 48,629,381-48,633,483   | let-7a, let-7f, let-7d                                                                                                           | IG           |
| <b>miR-27b</b>    | 13: 63,399,792-63,404,092   | miR-23b, miR-27b, miR-3074, miR-24                                                                                               | IT           |
| <b>miR-23b</b>    |                             |                                                                                                                                  | IT           |
| <b>miR-449a</b>   | 13: 113,825,742-113,829,832 | miR-449a, miR-449b, miR-449c                                                                                                     | IT           |
| <b>miR-92a</b>    | 14: 115,440,893-115,445,728 | miR-17, miR-18a, miR-19a, miR-20a, miR-19b, miR-92a                                                                              | IT           |
| <b>miR-19b</b>    |                             |                                                                                                                                  | IT           |
| <b>miR-17</b>     |                             |                                                                                                                                  | IT           |
| <b>miR-124</b>    | 14: 65,207,494-65,211,578   | miR-124, miR-3078                                                                                                                | IT           |
| <b>miR-30d</b>    | 15: 68,166,977-68,174,851   | miR-30d, miR-30b                                                                                                                 | IG           |
| <b>miR-30b</b>    |                             |                                                                                                                                  | IG           |
| <b>miR-148b</b>   | 15: 103,113,556-103,117,652 |                                                                                                                                  | IT           |
| <b>let-7b</b>     | 15: 85,535,749-85,539,833   | let-7c, let-7b                                                                                                                   | IG           |
| <b>miR-484</b>    | 16: 14,157,719-14,161,785   |                                                                                                                                  | IG           |
| <b>miR-28</b>     | 16: 24,825,941-24,830,026   |                                                                                                                                  | IT           |
| <b>miR-301b</b>   | 16: 17,122,154-17,126,589   | miR-301b, miR-130b                                                                                                               | IT           |
| <b>miR-130b</b>   |                             |                                                                                                                                  | IT           |
| <b>miR-99a</b>    | 16: 77,597,181-77,601,995   | miR-99a, let-7c                                                                                                                  | IT           |
| <b>let-7c</b>     |                             |                                                                                                                                  | IT           |

| <b>ID (mmu-)</b>   | <b>Genomic locus</b>       | <b>Clustered miRNAs (mmu-)</b>                                 | <b>IG/IT</b> |
|--------------------|----------------------------|----------------------------------------------------------------|--------------|
| <b>miR-193b</b>    | 16: 13,447,616-13,456,019  | miR-193b, miR-365                                              | IG           |
| <b>miR-365</b>     |                            |                                                                | IG           |
| <b>let-7e</b>      | 17: 17,965,152-17,969,843  | miR-99b, let-7e, miR-125a                                      | IG           |
| <b>miR-99b</b>     |                            |                                                                | IG           |
| <b>miR-125a-5p</b> |                            |                                                                | IT           |
| <b>miR-145</b>     | 18: 61,805,479-61,810,912  | miR-145, miR-143                                               | IT           |
| <b>miR-143</b>     |                            |                                                                | IG           |
| <b>miR-133a</b>    | 18: 10,780,907-10,784,974  | miR-1a, miR-1b, miR-133a                                       | IT           |
| <b>miR-146b</b>    | 19: 46,415,252-46,419,360  |                                                                | IT           |
| <b>miR-204</b>     | 19: 22,823,095-22,827,162  |                                                                | IT           |
| <b>miR-192</b>     | 19: 6,262,844-6,266,932    | miR-194, miR-192                                               | IG           |
| <b>miR-223</b>     | X: 93,436,156-93,440,265   |                                                                | IT           |
| <b>miR-532-3p</b>  | X: 6,823,528-6,827,623     | miR-532, miR-188, miR-362, miR-501                             | IT           |
| <b>miR-532-5p</b>  |                            |                                                                | IT           |
| <b>miR-362-3p</b>  |                            |                                                                | IT           |
| <b>miR-741</b>     | X: 64,041,065-64,052,050   | miR-881, miR-878, miR-880, miR-463, miR-741, miR-471, miR-883b | IG           |
| <b>miR-883b-3p</b> |                            |                                                                | IG           |
| <b>miR-465a-3p</b> | X: 64,090,227-64,094,300   | miR-465a, miR-465b, miR-465c                                   | IG           |
| <b>miR-222</b>     | X: 18,722,019-18,726,097   | miR-222, miR-221                                               | IG           |
| <b>miR-20b</b>     | X: 50,092,870-50,097,369   | miR-106a, miR-18b, miR-20b, miR-19b, miR-92a, miR-363          | IG           |
| <b>miR-363</b>     |                            |                                                                | IG           |
| <b>miR-652</b>     | X: 139,171,543-139,175,640 |                                                                | IT           |

| <b>ID (mmu-)</b>   | <b>Genomic locus</b>     | <b>Clustered miRNAs (mmu-)</b>                         | <b>IG/IT</b> |
|--------------------|--------------------------|--------------------------------------------------------|--------------|
| <b>miR-743a</b>    |                          |                                                        | IG           |
| <b>miR-743b-5p</b> | X: 64,027,932-64,036,008 | miR-883a, miR-742, miR-743b, miR-743a                  | IG           |
| <b>miR-883a-3p</b> |                          |                                                        | IG           |
| <b>miR-201</b>     | X: 65,239,271-65,243,336 | miR-201, miR-547                                       | IG           |
| <b>miR-676</b>     | X: 97,574,436-97,578,524 |                                                        | IT           |
| <b>miR-106a</b>    | X: 50,093,680-50,097,744 | miR-106a, miR-18b, miR-20b, miR-19b, miR-92a, miR-363  | IT           |
| <b>miR-322</b>     | X: 50,405,432-50,409,526 | miR-322, miR-503, miR-351, miR-542, miR-450a, miR-450b | IG           |
| <b>miR-470</b>     | X: 64,065,126-64,069,200 | miR-470, miR-871                                       | IG           |
